# Supplementary material for: Efficient solid-state synthesis of biomineralized vaterite-derived pure CaMnO3 perovskite for effective photocatalysis
Source: Royal Society of Chemistry journal article supplement (doi:10.1039/d1ce00386k), 2021-01-01
Supplement: d1ce00386k1.pdf [file d1ce00386k1.pdf]

## **Electronic Supporting Information**

### **Biomaterialized Vaterite derived Efficient solid-state synthesis of pure $\text{CaMnO}_3$ Perovskite as an effective photocatalyst**

Debojit Paul and Gopal Das\*

Department of Chemistry, Indian Institute of Technology Guwahati, Assam 781039, India.

Fax: + 91 361 258 2349; Tel: +91 361258 2313; E-mail: [gdas@iitg.ac.in](mailto:gdas@iitg.ac.in)

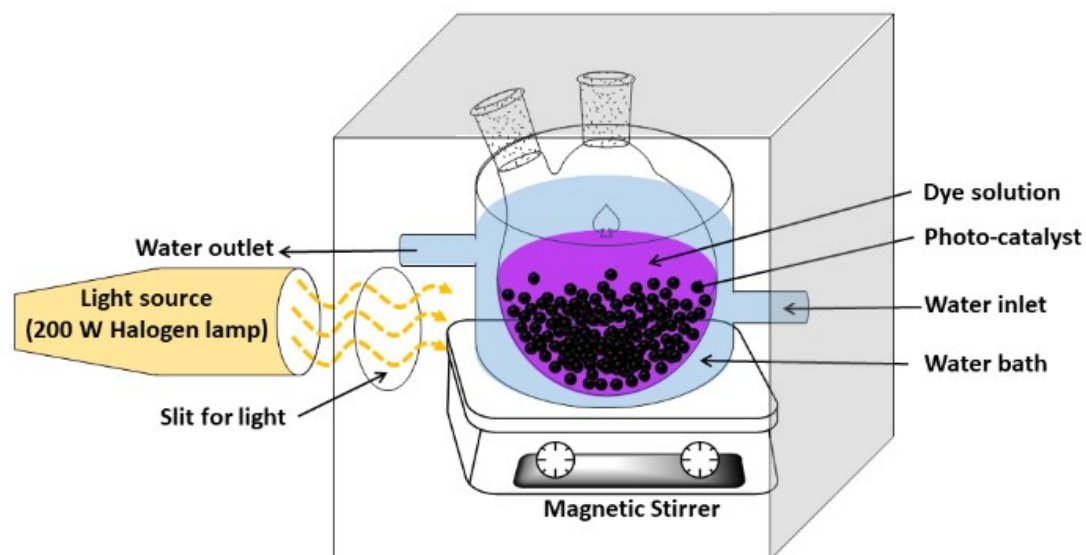

**Scheme S1:** Illustration of the photocatalytic device set up.

The wavelength spectrum of the light source (200 W Halogen lamp) was obtained from Spectroradiometer CS-200 (Konica Minolta). The experiment was performed by keeping the light source at a distance of 2 m from the spectroradiometer. The intensity of the light was found out to be 11507.13 cd/m<sup>2</sup> and the wavelength spectrum was obtained in the range of 380-780 nm, Fig. S1.

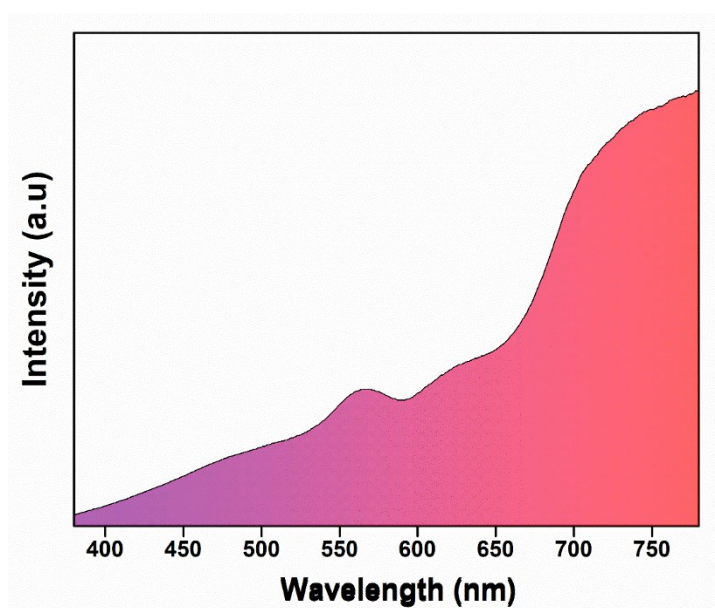

**Figure S1:** Wavelength spectrum of the 200 W Halogen lamp.

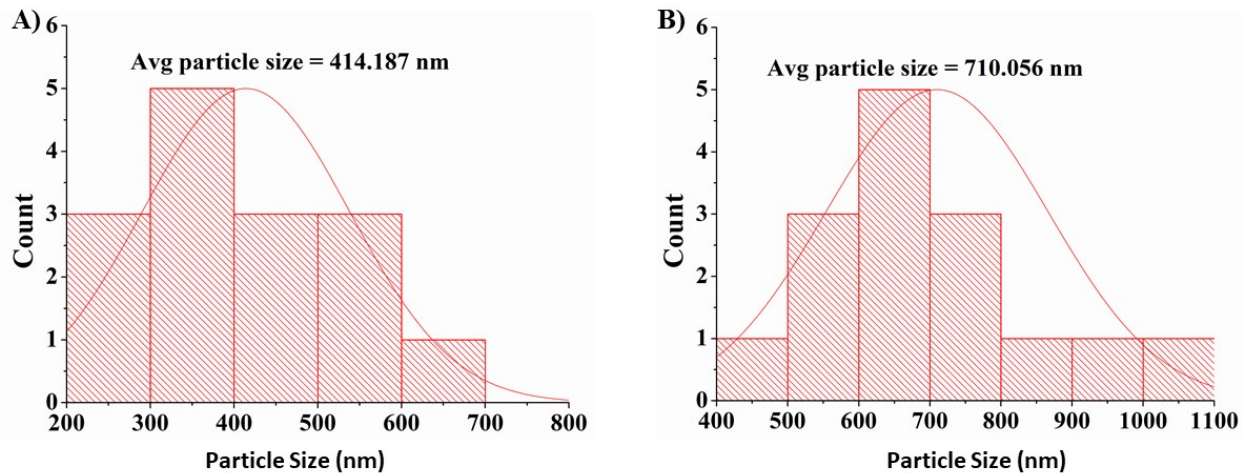

**Figure S2:** Average particle size of (A) pure CaMnO<sub>3</sub> particles; (B) Mixed phase CMOs.

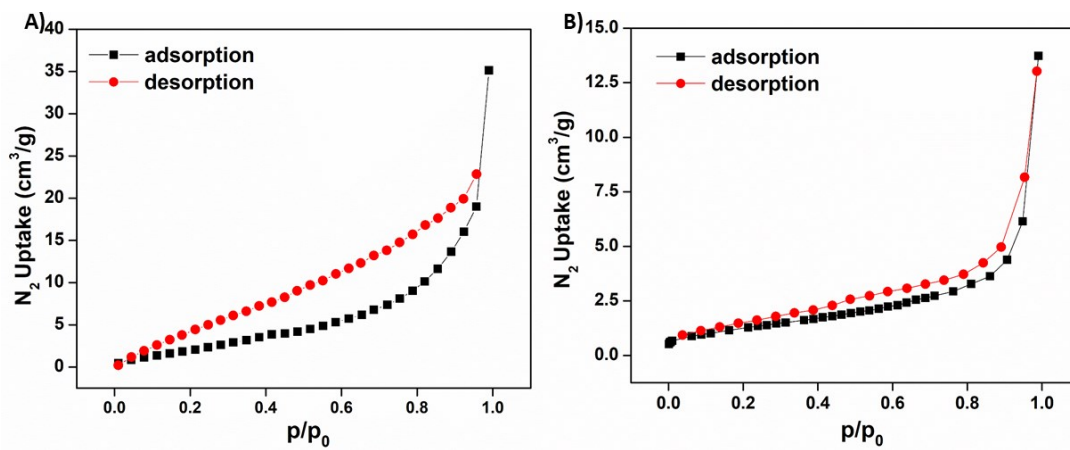

**Figure S3:** Nitrogen adsorption-desorption BET isotherm (A) CaMnO<sub>3</sub>; (B) Mixed Phase.

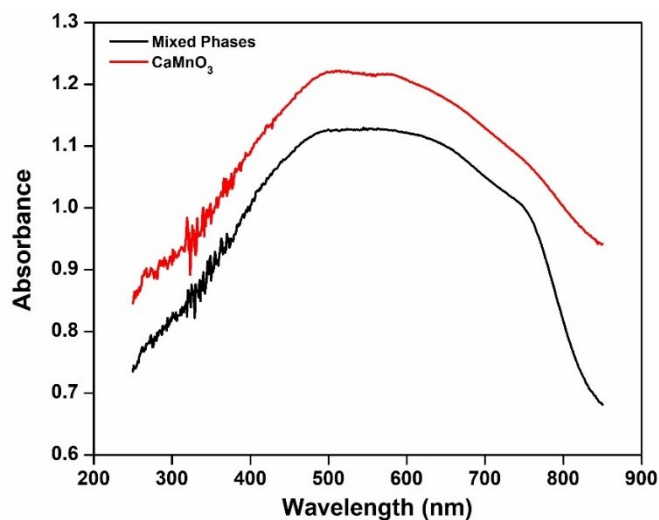

**Figure S4:** UV/visible diffuse reflectance spectra of  $\text{CaMnO}_3$  and the mixed phase CMOs.

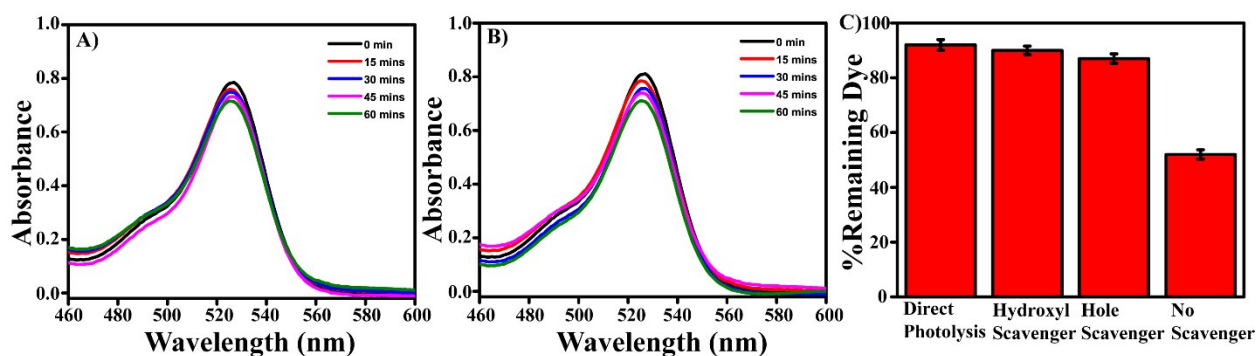

**Figure S5:** UV/Vis absorption spectra of the photolytic degradation of Rhodamine 6G catalyzed by  $\text{CaMnO}_3$  in the presence (A)  $\cdot\text{OH}$  scavenger; (B)  $\text{h}^+$  scavenger; and (C) Percentage degradation of Rhodamine 6G in the presence and absence of the scavengers.

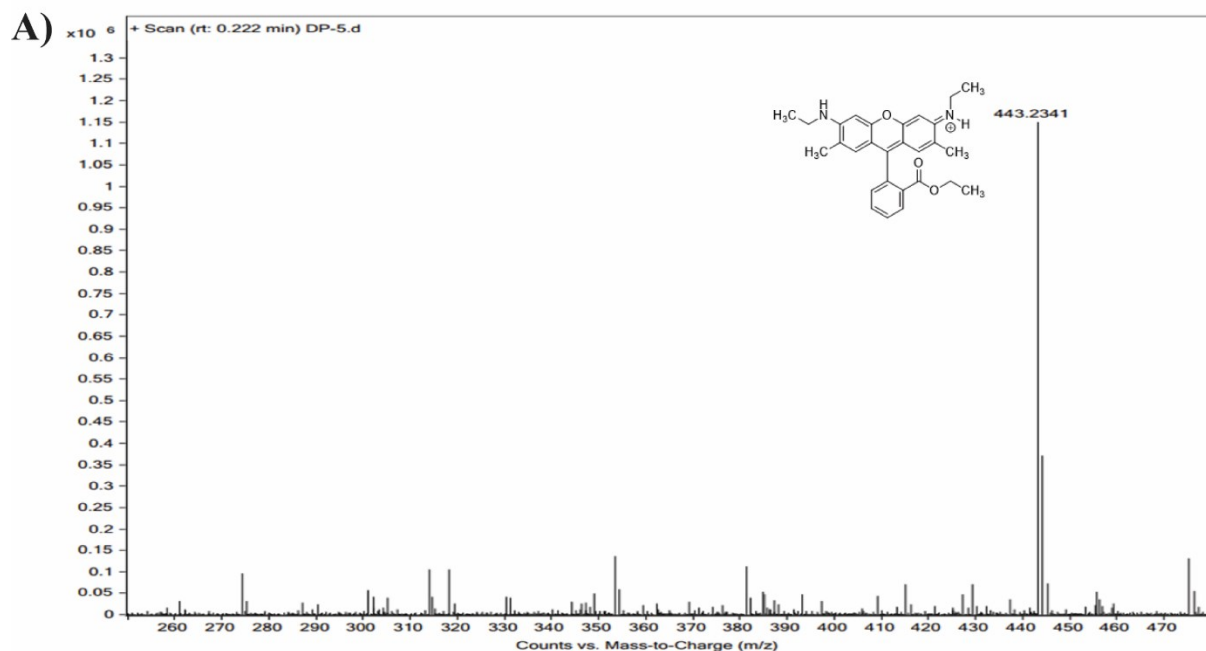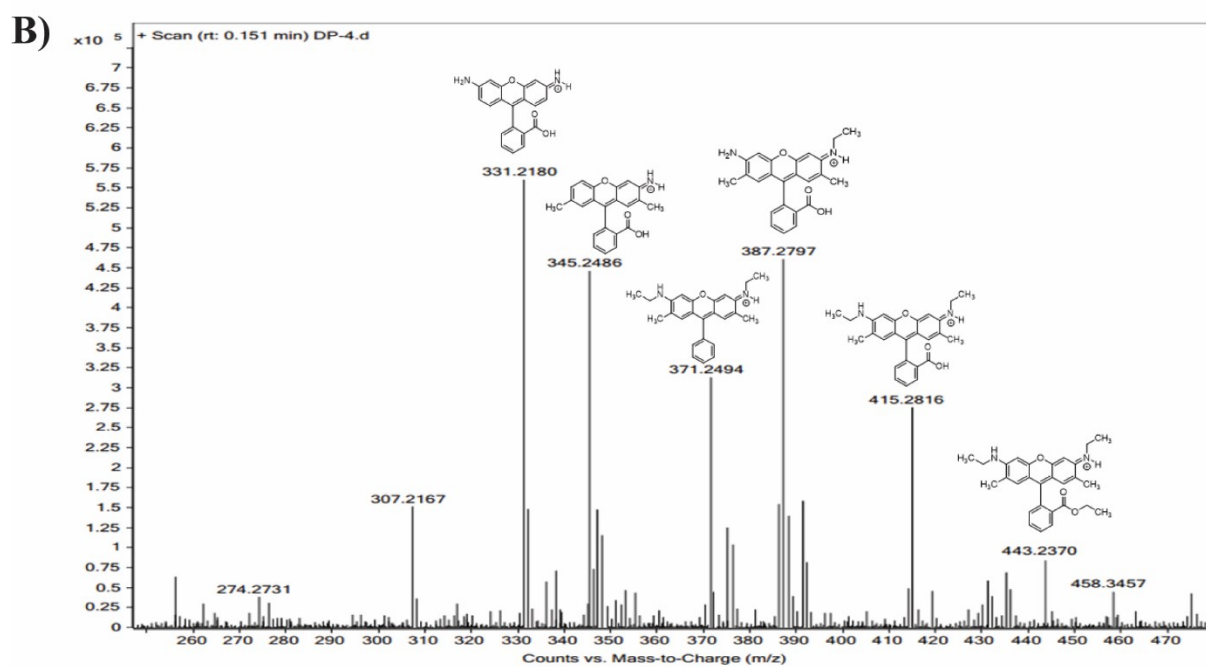

**Figure S6:** Mass spectrum of Rh 6G (A) before light irradiation; (B) after 2 hours of light irradiation.

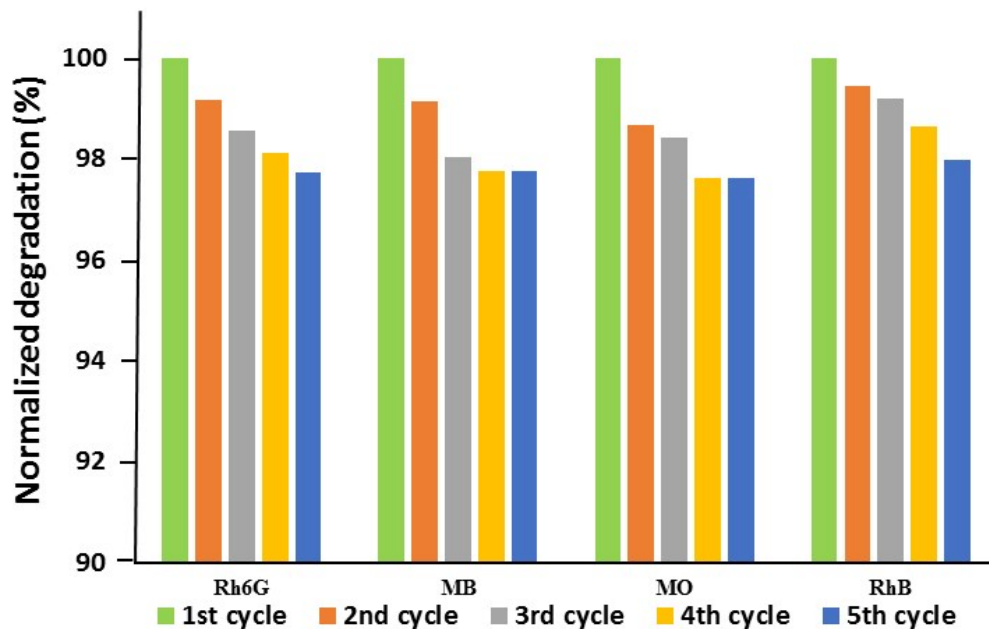

**Figure S7:** Normalized dye-degradation percentages of the different dyes upon recyclability and reusability.

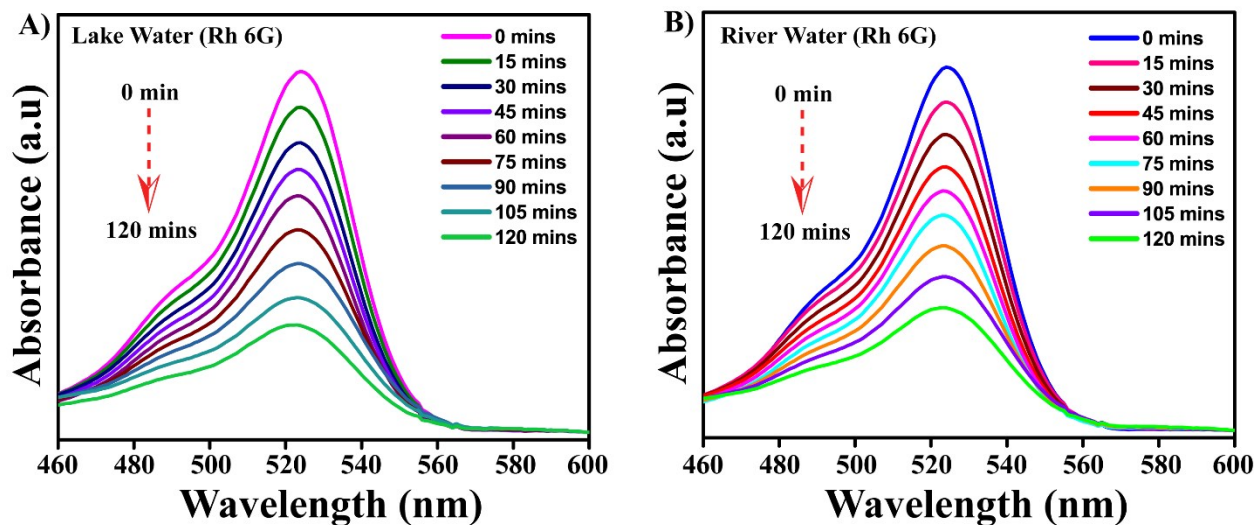

**Figure S8:** UV/Vis absorption spectra of the photolytic degradation of Rhodamine 6G catalyzed by  $\text{CaMnO}_3$  performed in (A) Lake water and (B) River water.

**Table S1:** Photocatalytic activity of calcium manganese oxides towards the degradation of Rhodamine 6G

| <b>Reference</b>                                                    | <b>Photocatalyst</b>                           | <b>Time (mins)</b> | <b>Percentage of Degradation (%)</b> |
|---------------------------------------------------------------------|------------------------------------------------|--------------------|--------------------------------------|
| <i>J. Phys. Chem., C</i> 2014, <b>118</b> , <b>41</b> , 24127–24135 | CaMn <sub>3</sub> O <sub>6</sub>               | 240                | 82                                   |
| <i>J. Solid State Chem.</i> , 2020, <b>288</b> , 121390             | CaMnO <sub>3</sub>                             | 180                | 62                                   |
|                                                                     | CaMn <sub>2</sub> O <sub>4</sub>               | 180                | 61                                   |
|                                                                     | Ca <sub>2</sub> Mn <sub>3</sub> O <sub>8</sub> | 180                | 32                                   |
| <b>This work</b>                                                    | <b>CaMnO<sub>3</sub></b>                       | <b>120</b>         | <b>72</b>                            |
